# Supplementary material for: Sustainable development through frugal innovation: the role of leadership, entrepreneurial bricolage and knowledge diversity
Source: Springer Nature journal article supplement (doi:10.1007/s11846-024-00764-y), 2024-04-24
Supplement: MOESM1 [file 27014498]

# Change of authorship request form (pre-acceptance)

**Please read the important information on page 4 before you begin**

This form should be used by authors to request any change in authorship including changes in corresponding authors. Please fully complete all sections. Use black ink and block capitals and provide each author's full name with the given name first followed by the family name.

Please note: In author collaborations where there is formal agreement for representing the collaboration, it is sufficient for the representative or legal guarantor (usually the corresponding author) to complete and sign the Authorship Change Form on behalf of all authors.

**Section 1: Please provide the current title of manuscript**

(For journals: Please provide the manuscript ID, title and/or DOI if available.)

(For books: Please provide the title, ISBN and/or DOI if available.)

Title: Sustainable Development through Frugal Innovation: The Role of Leadership, Entrepreneurial Bricolage and Knowledge Diversity

Manuscript ID no. in case of unpublished manuscript: RMSC-D-23-00670R1

DOI in case of published manuscript:

ISBN (for books):

**Section 2: Please provide the previous authorship, in the order shown on the manuscript before the changes were introduced. Please indicate the corresponding author by adding (CA) behind the name.**

|                        | First name(s) | Family name   | ORCID or SCOPUS id, if available |
|------------------------|---------------|---------------|----------------------------------|
| 1 <sup>st</sup> author | Katarzyna     | Piwowar-Sulej |                                  |
| 2 <sup>nd</sup> author | Qaisar        | Iqbal         |                                  |
| 3 <sup>rd</sup> author | Andreas       | Kallmuenzer   |                                  |
| 4 <sup>th</sup> author |               |               |                                  |
| 5 <sup>th</sup> author |               |               |                                  |
| 6 <sup>th</sup> author |               |               |                                  |
| 7 <sup>th</sup> author |               |               |                                  |

Please use an additional sheet if there are more than 7 authors.

## Change of authorship request form (pre-acceptance)

Section

**3: Please provide a justification for change. Please use this section to explain your reasons for changing the authorship of your manuscript, e.g. what necessitated the change in authorship? Please refer to the (journal) policy pages for more information about authorship. Please explain why omitted authors were not originally included and/or why authors were removed on the submitted manuscript.**

The initial idea of this paper was generated by Qaisar Iqbal, He has also substantially contributed to the paper in research methodology, data analysis. Qaisar Iqbal has responded to reviewers comments in review process and arranged proofreading as well. Considering his contributions, we all authors developed consensus to offer him first authorship. At the same time, while submitting paper at the first time, we made an error in the authorship list. So, we fixed that sequence now.

**Section 4: Proposed new authorship. Please provide your new authorship list in the order you would like it to appear on the manuscript. Please indicate the corresponding author by adding (CA) behind the name. If the corresponding author has changed, please indicate the reason under section 3.**

|                        | First name(s) | Family name (this name will appear in full on the final publication and will be searchable in various abstract and indexing databases) |
|------------------------|---------------|----------------------------------------------------------------------------------------------------------------------------------------|
| 1 <sup>st</sup> author | Qaisar        | Iqbal                                                                                                                                  |
| 2 <sup>nd</sup> author | Katarzyna     | Piwowar-Sulej                                                                                                                          |
| 3 <sup>rd</sup> author | Andreas       | Kallmuenzer                                                                                                                            |
| 4 <sup>th</sup> author |               |                                                                                                                                        |
| 5 <sup>th</sup> author |               |                                                                                                                                        |
| 6 <sup>th</sup> author |               |                                                                                                                                        |
| 7 <sup>th</sup> author |               |                                                                                                                                        |

# Change of authorship request form (pre-acceptance)

**Section**

Please use an additional sheet if there are more than 7 authors.

**5: Author contribution, Acknowledgement and Disclosures.** Please use this section to provide a new disclosure statement and, if appropriate, acknowledge any contributors who have been removed as authors and ensure you state what contribution any new authors made (if applicable per the journal or book (series) policy). **Please ensure these are updated in your manuscript - after approval of the change(s) - as our production department will not transfer the information in this form to your manuscript.**

**New acknowledgements:**

**New Disclosures (financial and non-financial interests, funding):**

**New Author Contributions statement (if applicable per the journal policy):**

State 'Not applicable' if there are no new authors.

**6: Declaration of agreement.** All authors, unchanged, new and removed *must* sign this declaration.

**(NB: Please print the form, sign and return a scanned copy. Please note that signatures that have been inserted as an image file are acceptable as long as it is handwritten. Typed names in the signature box are unacceptable.) \* Please delete as appropriate. Delete all of the bold if you were on the original authorship list and are remaining as an author.**

|            |             |           |                      |      |
|------------|-------------|-----------|----------------------|------|
| First name | Family name | Signature | Affiliated institute | Date |
|------------|-------------|-----------|----------------------|------|

## Change of authorship request form (pre-acceptance)

| Section | 1 <sup>st</sup> author | 2 <sup>nd</sup> author         | 3 <sup>rd</sup> author | 4 <sup>th</sup> authors | 5 <sup>th</sup> author | 6 <sup>th</sup> author | 7 <sup>th</sup> author |
|---------|------------------------|--------------------------------|------------------------|-------------------------|------------------------|------------------------|------------------------|
|         | <b>Qaisar</b>          | <b>Iqbal</b>                   |                        |                         |                        |                        |                        |
|         |                        | <b>Katarzyna Piwowar-Sulej</b> |                        |                         |                        |                        |                        |
|         |                        |                                | <b>Andreas</b>         |                         |                        |                        |                        |
|         |                        |                                |                        |                         |                        |                        |                        |
|         |                        |                                |                        |                         |                        |                        |                        |
|         |                        |                                |                        |                         |                        |                        |                        |
|         |                        |                                |                        |                         |                        |                        |                        |

Please use an additional sheet if there are more than 7 authors.

**SPRINGER NATURE** ...

Springer Nature is one of the world's leading global research, educational and professional publishers, created in May 2015 through the combination of Nature Publishing Group, Palgrave Macmillan, Macmillan Education and Springer Science+Business Media.

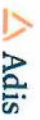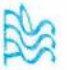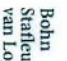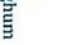

palgrave  
macmillan

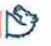

Springer

## Change of authorship request form (pre-acceptance)

### Important information. Please read.

- Please return this form, fully completed, to Springer Nature. We will consider the information you have provided to decide whether to approve the proposed change in authorship. We may choose to contact your institution for more information or undertake a further investigation, if appropriate, before making a final decision.
- By signing this declaration, all authors guarantee that the order of the authors are in accordance with their scientific contribution, if applicable as different conventions apply per discipline, and that only authors have been added who made a meaningful contribution to the work.
- Please note, we cannot investigate or mediate any authorship disputes. If you are unable to obtain agreement from all authors (including those who you wish to be removed) you must refer the matter to your institution(s) for investigation. Please inform us if you need to do this.
- If you are not able to return a fully completed form within **30 days** of the date that it was sent to the author requesting the change, we may have to withdraw your manuscript. We cannot publish manuscripts where authorship has not been agreed by all authors (including those who have been removed).
- Incomplete forms will be rejected.

**SPRINGER NATURE**

Springer Nature is one of the world's leading global research, educational and professional publishers, created in May 2015 through the combination of Nature Publishing Group, Palgrave Macmillan, Macmillan Education and Springer Science+Business Media.
